# Supplementary figures and images for: The Biocatalytic Degradation of Organic Dyes Using Laccase Immobilized Magnetic Nanoparticles
Source: MDPI journal article supplement (doi:10.3390/app11178216), 2021-09-04

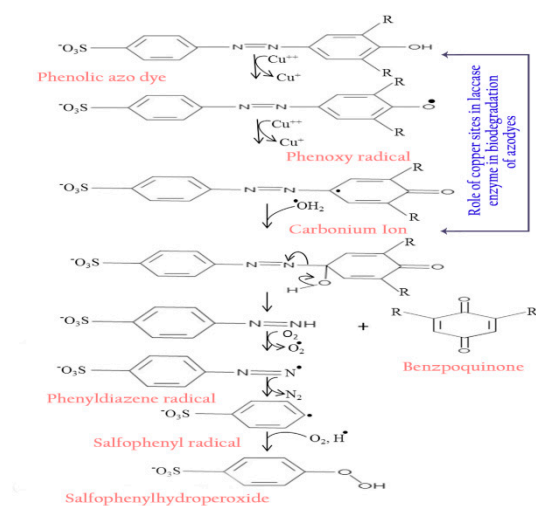

**Scheme S1.** The mechanism of phenolic azo dye biodegradation using laccase enzyme.

Supplement: s1 [file s1]
